# Supplementary material for: Design, Synthesis and Comprehensive Investigations of Pyrrolo[3,4-d]pyridazinone-Based 1,3,4-Oxadiazole as New Class of Selective COX-2 Inhibitors
Source: PubMed Central journal article supplement (PMC7766220; doi:10.3390/ijms21249623), 2020-12-17
Supplement: ijms-21-09623-s001.pdf [file ijms-21-09623-s001.pdf]

## SUPPLEMENTARY DATA

# **Pyrrolo[3,4-*d*]pyridazinone derivatives bearing 1,3,4-oxadiazole moiety can serve as new class of selective COX-2 inhibitors. Design, synthesis, molecular docking, comprehensive spectroscopic and *in vitro* investigations**

**Lukasz Szczukowski<sup>1\*</sup>, Edward Krzyżak<sup>2</sup>, Adrianna Zborowska<sup>3</sup>, Patrycja Zając<sup>3</sup>, Katarzyna Potyrak<sup>3</sup>, Krzysztof Peregrym<sup>3</sup>, Benita Wiatrak<sup>4, 5</sup>, Aleksandra Marciniak<sup>2</sup> and Piotr Świątek<sup>1</sup>**

<sup>1</sup> Department of Medicinal Chemistry, Wrocław Medical University, Borowska 211, 50-556 Wrocław, Poland;

<sup>2</sup> Department of Inorganic Chemistry, Wrocław Medical University, Borowska 211a, 50-556, Wrocław, Poland;

<sup>3</sup> Student Scientific Club of Medicinal Chemistry, Wrocław Medical University, Borowska 211, 50-556 Wrocław, Poland;

<sup>4</sup> Department of Basic Medical Sciences, Wrocław Medical University, Borowska 211, 50-556 Wrocław, Poland;

<sup>5</sup> Department of Pharmacology, Wrocław Medical University, Mikulicza-Radeckiego 2 50-345 Wrocław, Poland;

\* Correspondence: lukasz.szczukowski@umed.wroc.pl; Tel.: +48 71 784-03-90

## **Table of contents**

|                                                           |           |
|-----------------------------------------------------------|-----------|
| <b>1. NMR spectra of new compounds.....</b>               | <b>2</b>  |
| <b>2. IR spectra of new compounds.....</b>                | <b>6</b>  |
| <b>3. Mass spectra of new compounds.....</b>              | <b>8</b>  |
| <b>4. Figures and tables.....</b>                         | <b>10</b> |
| <b>Fig. S1. Equations used spectroscopic studies.....</b> | <b>10</b> |

# 1. NMR spectra of new compounds

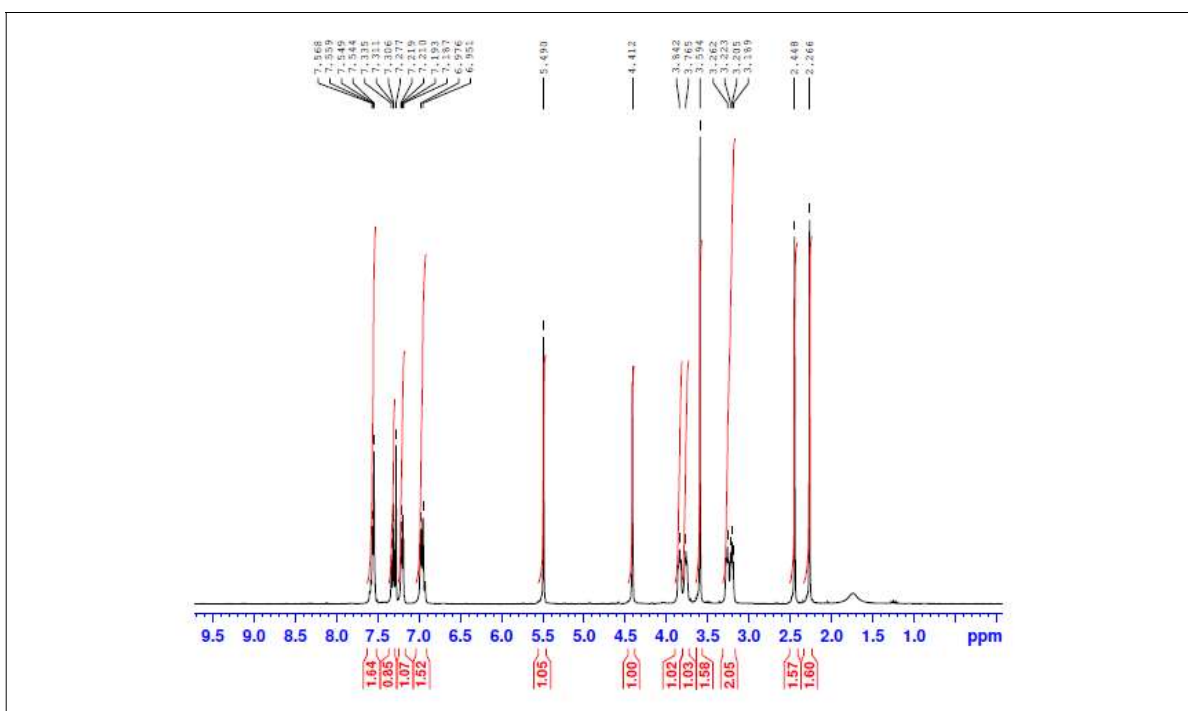

5a

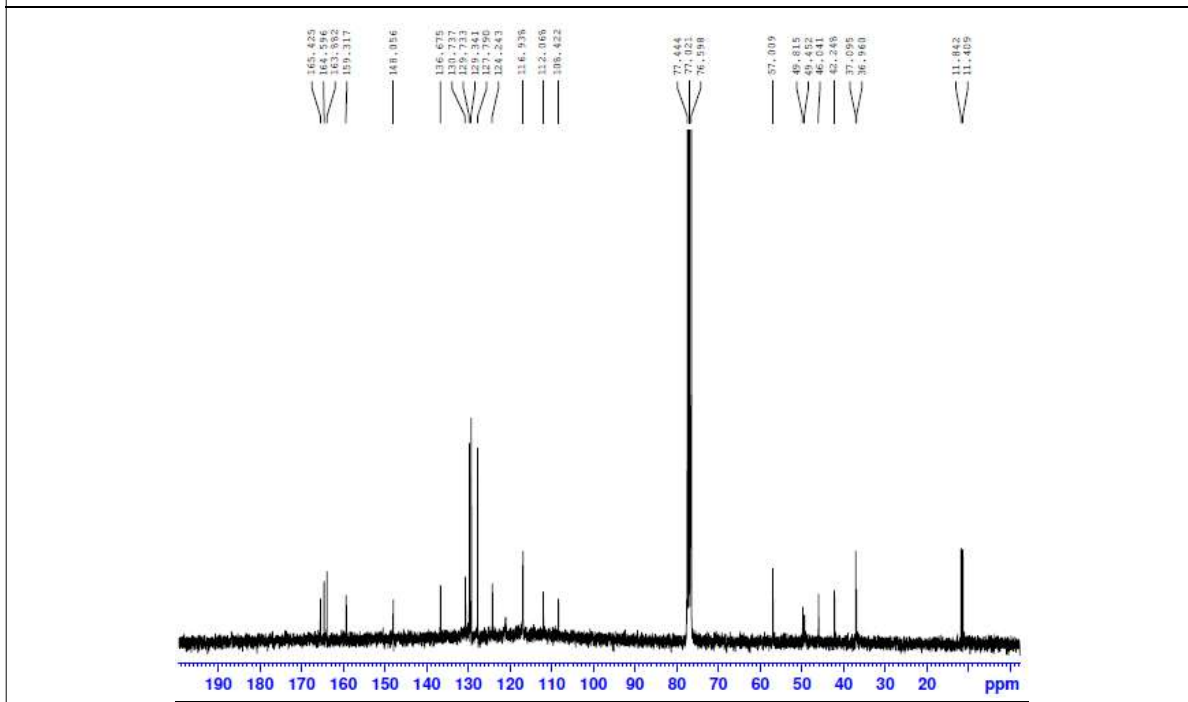

5a

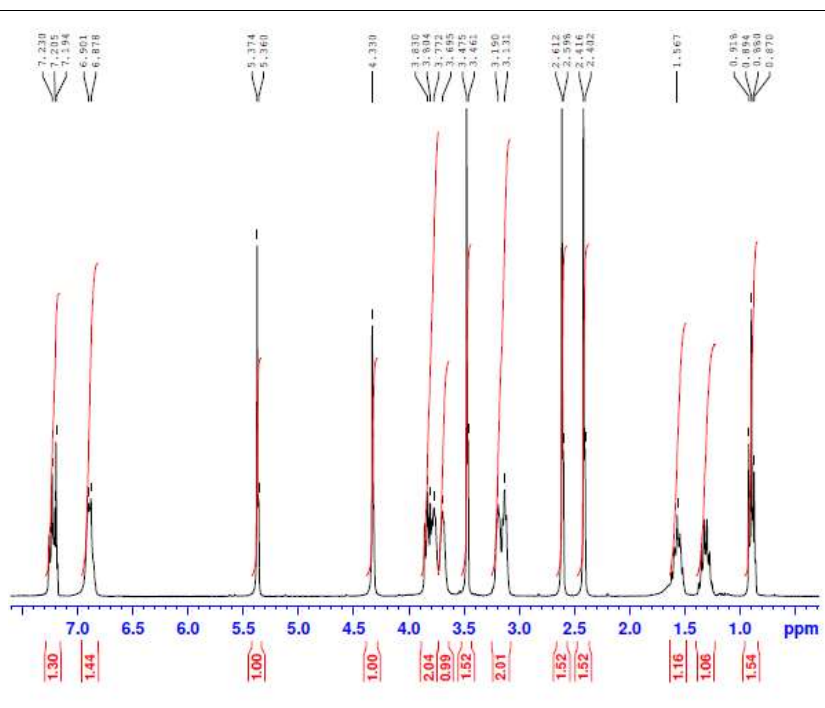

5b

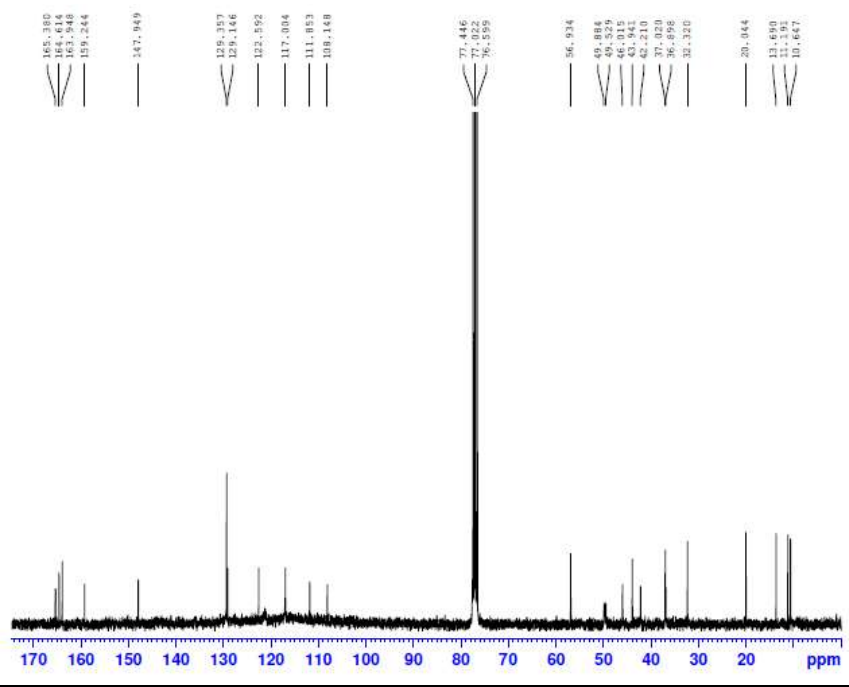

5b

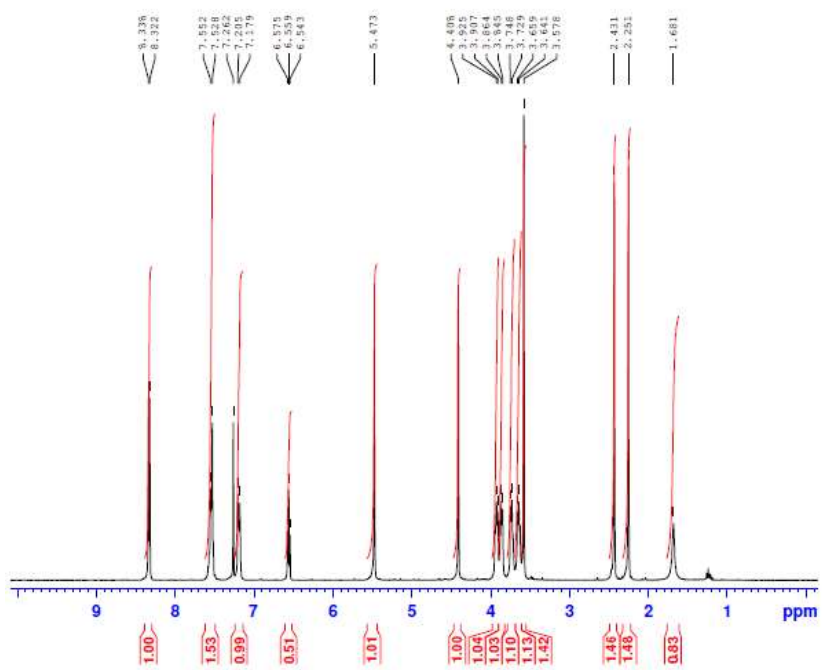

**6a**

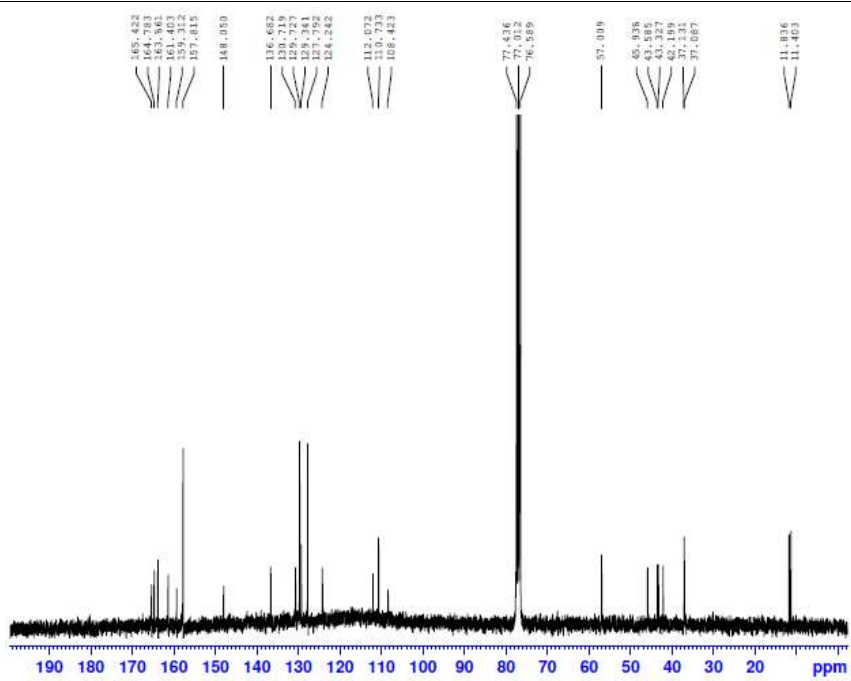

**6a**

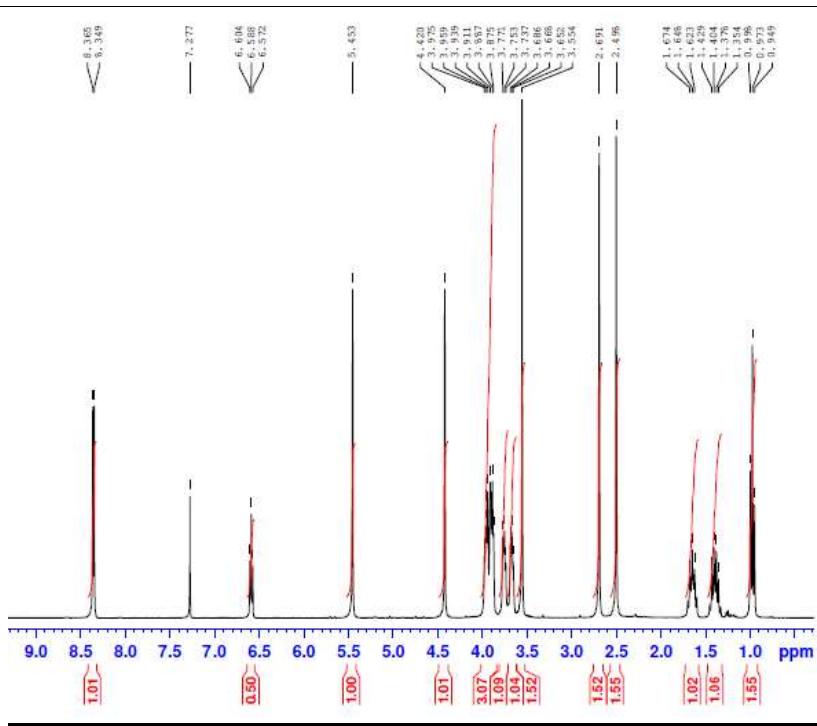

6b

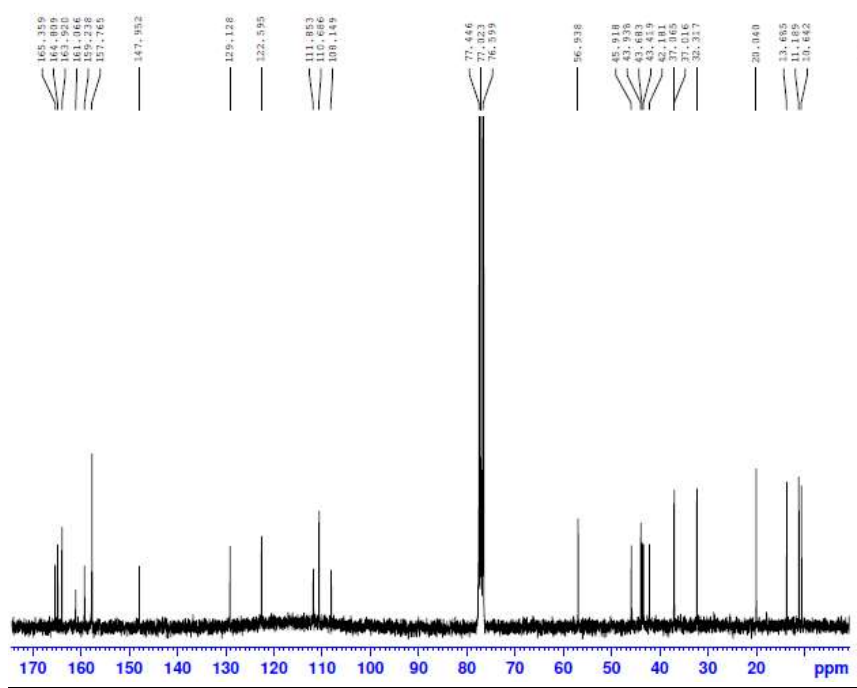

6b

## 2. IR spectra of new compounds

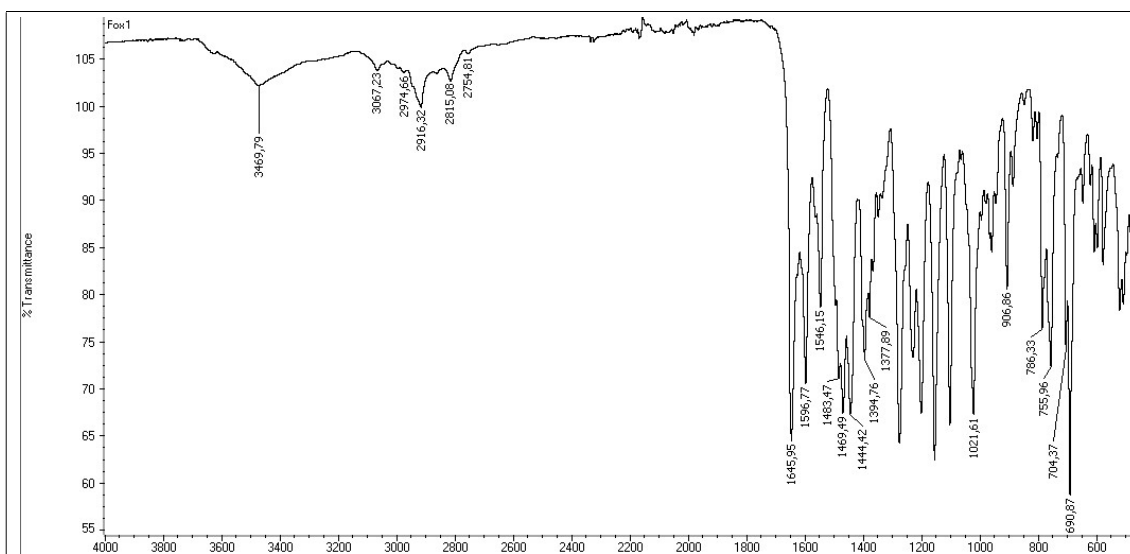

5a

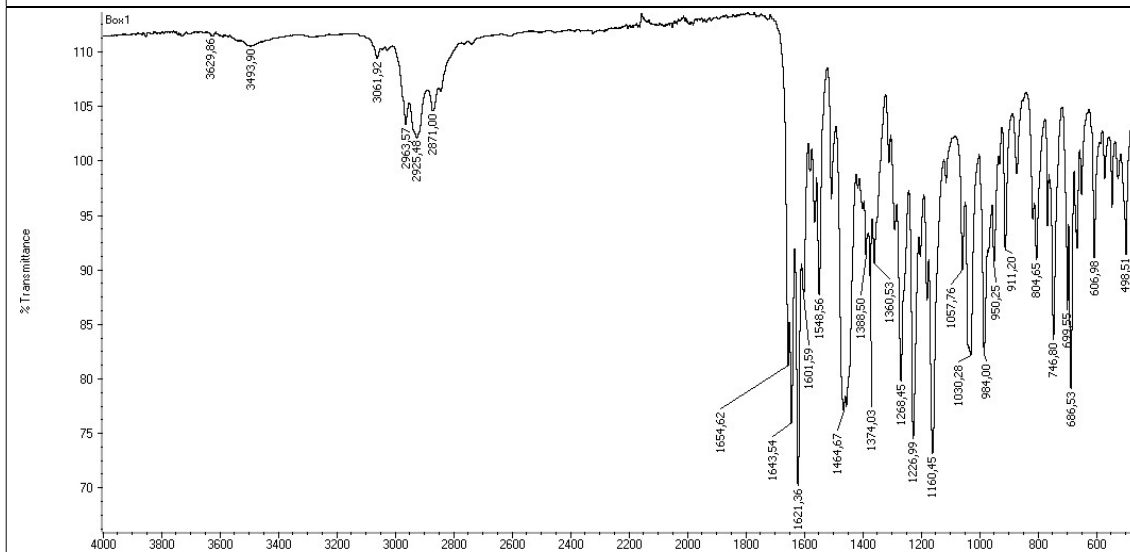

5b

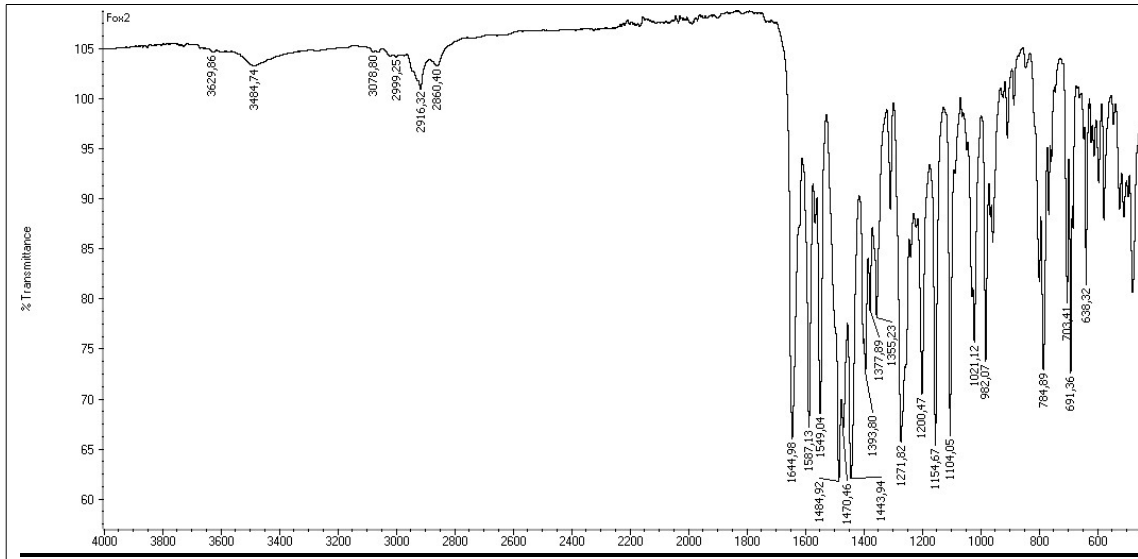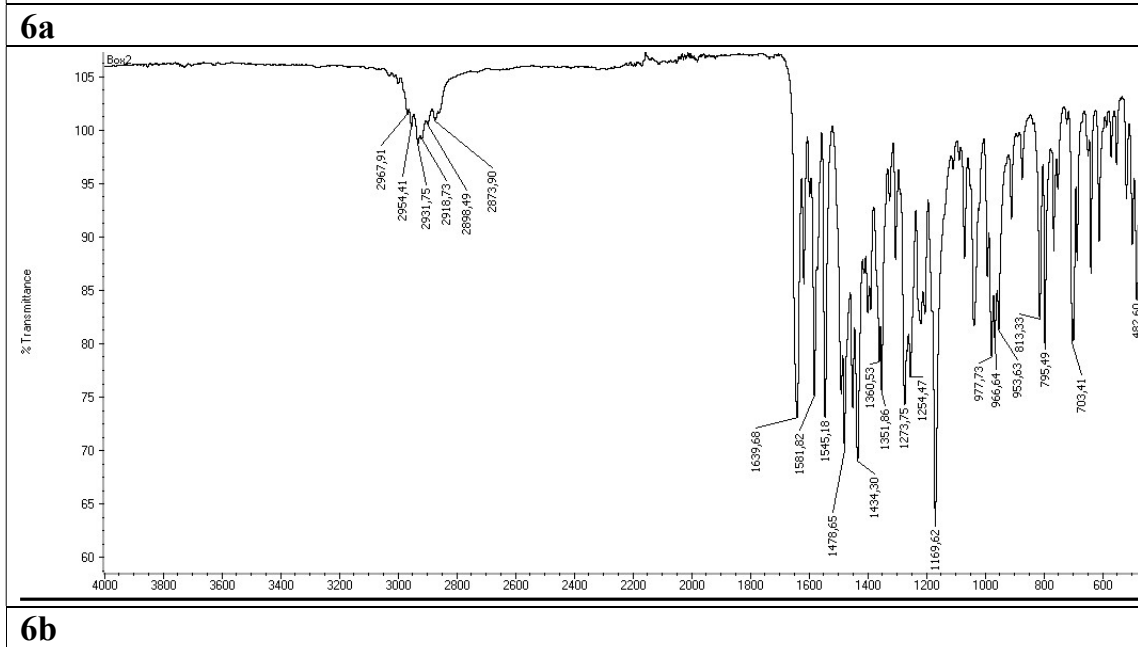

### 3. Mass spectra of new compounds

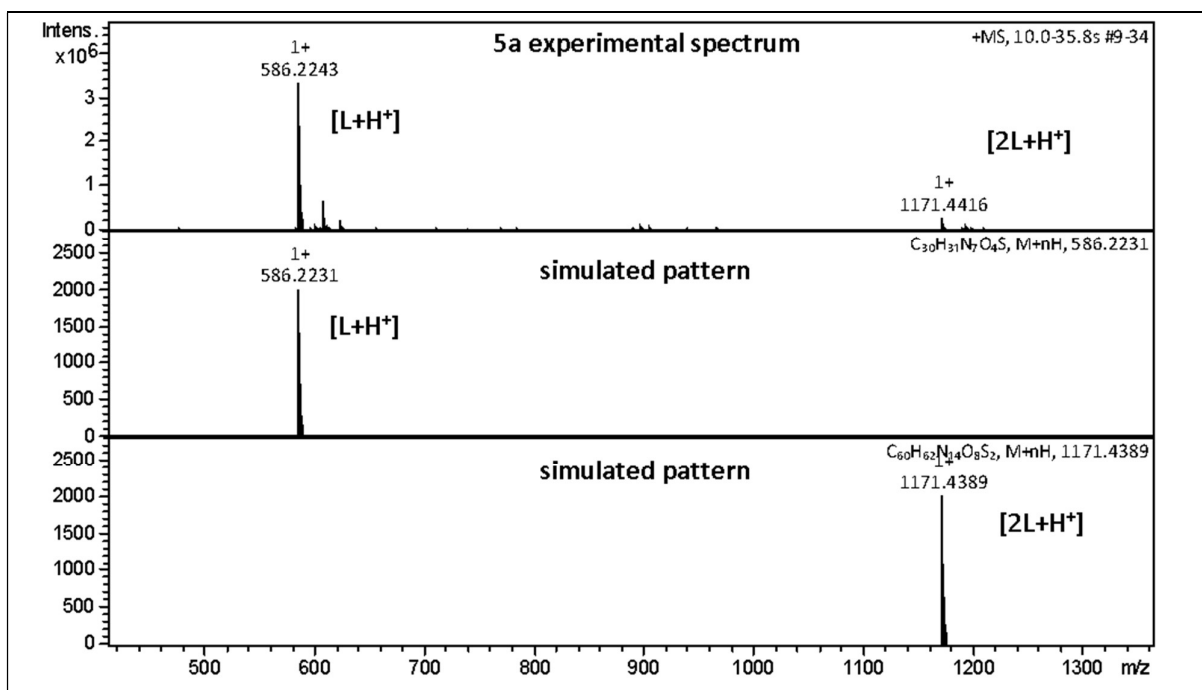

**5a**

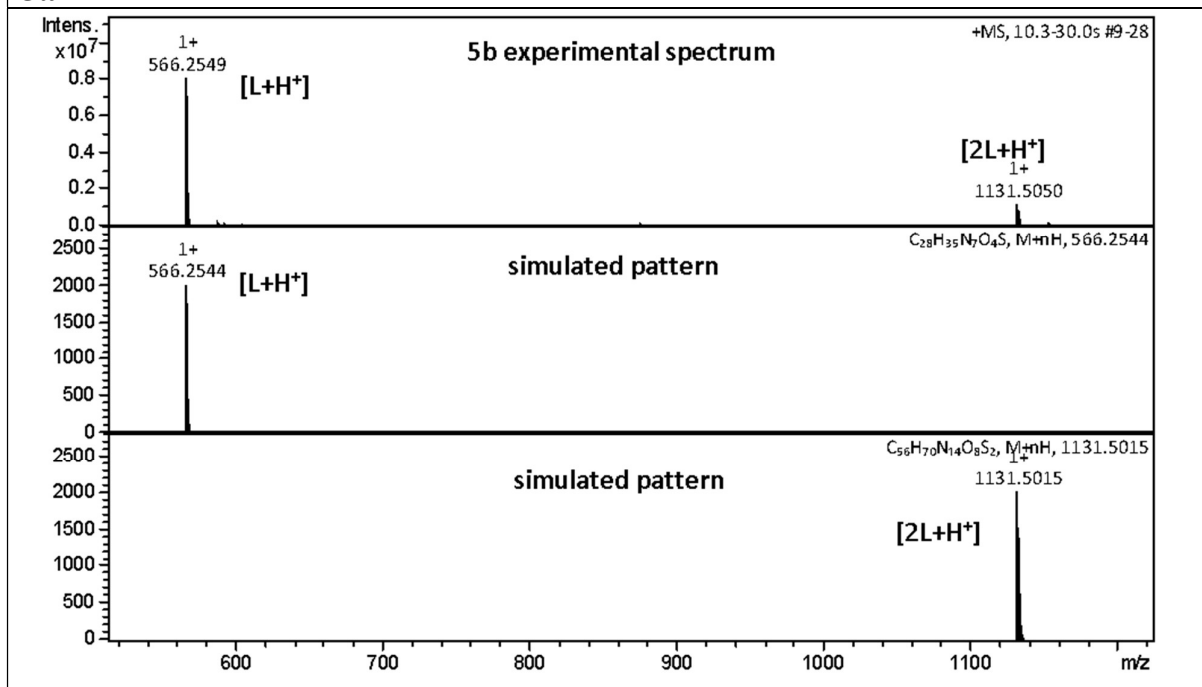

**5b**



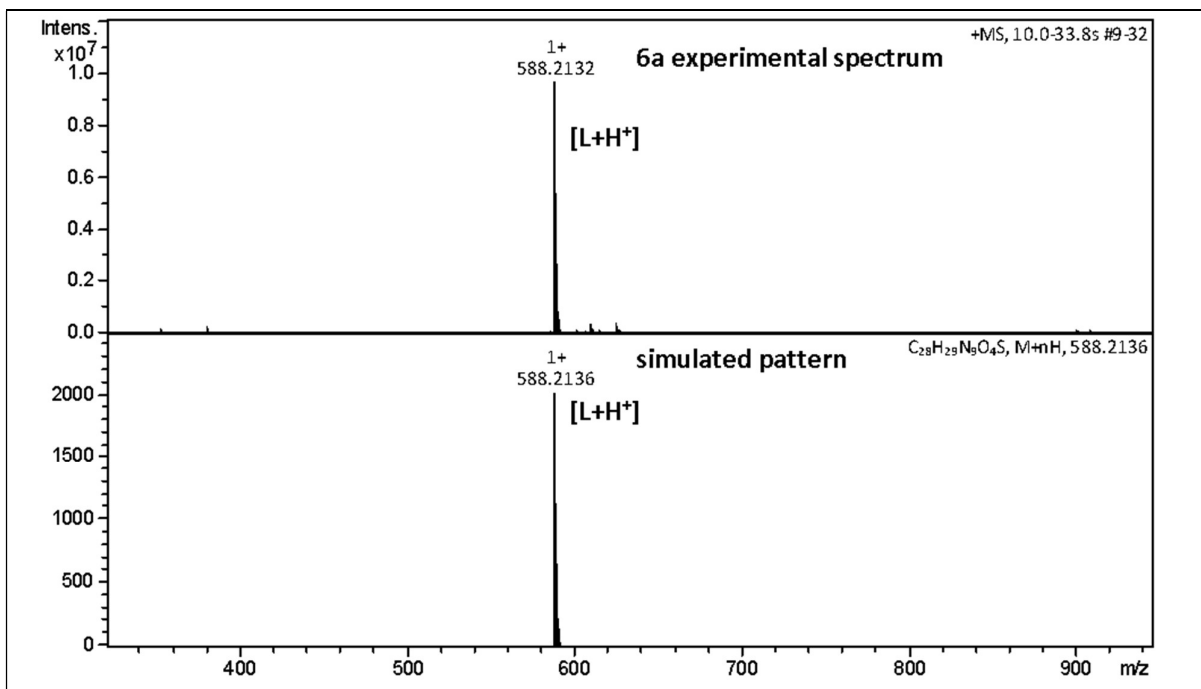

**6a**

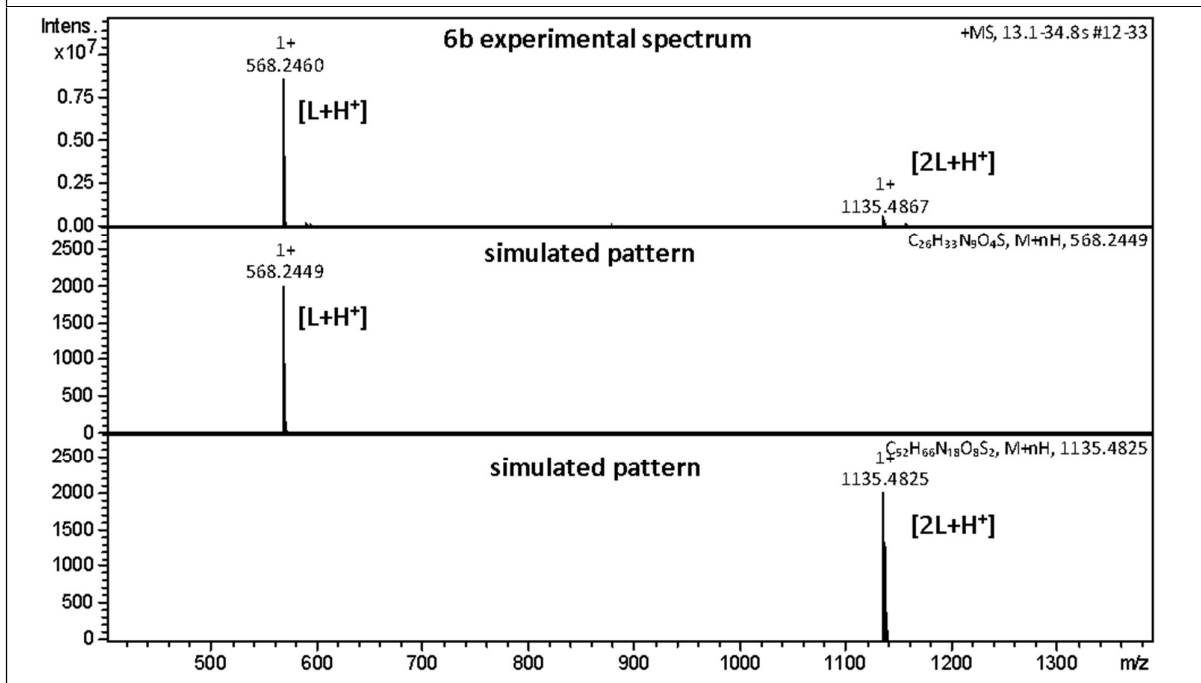

**6b**

## 4. Figures and tables

**Fig. S1.** Equations used spectroscopic studies.

|                                                                                                                                                                                                                                                                                                                                                          |
|----------------------------------------------------------------------------------------------------------------------------------------------------------------------------------------------------------------------------------------------------------------------------------------------------------------------------------------------------------|
| $F_{corr} = F_{obs} 10^{\frac{(A_{ex} + A_{em})}{2}} \quad (1)$                                                                                                                                                                                                                                                                                          |
| <b>Eq.1</b><br>where, $F_{corr}$ and $F_{obs}$ are the corrected and observed fluorescence intensities, respectively. $A_{ex}$ and $A_{em}$ are the absorbance values at excitation and emission wavelengths, respectively.                                                                                                                              |
| $\frac{F_0}{F} = 1 + k_q \tau [Q] = 1 + K_{sv} \quad (2)$                                                                                                                                                                                                                                                                                                |
| <b>Eq.2</b><br>where $F_0$ and $F$ are the steady-state fluorescence intensities at the maximum wavelength in the absence and presence of quencher, respectively, $k_q$ the quenching rate constant of the biomolecule, $\tau_0$ the average lifetime of the biomolecule, $[Q]$ is the quencher concentration, and $K_{sv}$ is the Stern–Volmer constant |
| $\log \frac{F_0 - F}{F} = \log K_b + n \log [Q] \quad (3)$                                                                                                                                                                                                                                                                                               |
| <b>Eq.3</b><br>where $F_0$ and $F$ are the steady-state fluorescence intensities at the maximum wavelength in the absence and presence of quencher, respectively, $[Q]$ is the quencher concentration                                                                                                                                                    |
| $\log K_b = -\frac{\Delta H^\circ}{RT} + \frac{\Delta S^\circ}{R} \quad (4)$ $\Delta G^\circ = \Delta H^\circ - T\Delta S^\circ = -RT \ln K_b \quad (5)$                                                                                                                                                                                                 |
| <b>Eq.4 and eq. 5</b><br>where $K_b$ is the binding constant, $R$ is the universal gas constant, entropic change ( $\Delta S^\circ$ ), free energy change ( $\Delta G^\circ$ ), enthalpy change ( $\Delta H^\circ$ )                                                                                                                                     |
